## P2531

### Impact of age on clinical outcomes after PCI in patients with ACS and stable CAD treated with 23-month ticagrelor monotherapy following 1-month DAPT in the randomized GLOBAL LEADERS study

M. Tomaniak<sup>1</sup>, P. Chichareon<sup>2</sup>, R. Modolo<sup>2</sup>, P. Buszman<sup>3</sup>, M. Sabate<sup>4</sup>, T. Geisler<sup>5</sup>, C. Hamm<sup>6</sup>, P.G. Steg<sup>7</sup>, Y. Onuma<sup>8</sup>, P. Vranckx<sup>9</sup>, M. Valgimigli<sup>10</sup>, S. Windecker<sup>10</sup>, R. Anderson<sup>11</sup>, M. Dominici<sup>12</sup>, P.W. Serruys<sup>13</sup>

<sup>1</sup>Erasmus Medical Centre, ThoraxCenter, Warsaw Medical University, Rotterdam, Netherlands (The); <sup>2</sup>Academic Medical Center of Amsterdam, Amsterdam, Netherlands (The); <sup>3</sup>Medical University of Silesia, Katowice, Poland; <sup>4</sup>Clinic Hospital Barcelona, Barcelona, Spain; <sup>5</sup>Uniklinikum Tübingen, Tübingen, Germany; <sup>6</sup>University of Giessen, Giessen, Germany; <sup>7</sup>FACT (French Alliance for Cardiovascular Trials), Université Paris Diderot, Hôpital Bichat, Paris, France; <sup>8</sup>Erasmus Medical Centre, Rotterdam, Netherlands (The); <sup>9</sup>Hartcentrum Hasselt, Jessa Ziekenhuis, Hasselt, Belgium; <sup>10</sup>Bern University Hospital, Inselspital, University of Bern, Bern, Switzerland; <sup>11</sup>University Hospital of Wales, Cardiff, United Kingdom; <sup>12</sup>Azienda Ospedaliera S. Maria, Terni, Italy; <sup>13</sup>NHLI, Imperial College London, London, London, United Kingdom

On behalf of GLOBAL LEADERS

**Funding Acknowledgement:** European Clinical Research Institute, which received unrestricted grants from Biosensors International, AstraZeneca, and the Medicines Company.

**Background:** The efficacy and safety of ticagrelor monotherapy in elderly patients undergoing percutaneous coronary intervention (PCI) for acute coronary syndromes (ACS) or stable coronary artery disease (CAD) has not been evaluated.

**Purpose:** To evaluate the efficacy and safety of ticagrelor monotherapy following 1-month dual antiplatelet therapy (DAPT) after PCI in relation to age and clinical presentation in the GLOBAL LEADERS study cohort.

**Methods:** This is a subanalysis of the randomized multicentre GLOBAL LEADERS study, comparing the experimental strategy of 23-month ticagrelor monotherapy after 1 month of ticagrelor and aspirin with the reference strategy of 12-month DAPT followed by 12-month aspirin monotherapy in 15991 patients undergoing PCI. Patients were categorized into elderly and very elderly according to a pre-specified cut-off of 75 years and a post-hoc defined cut-off of 80 years. Impact of age and clinical presentation (ACS versus stable CAD) on clinical outcome at 2 years was evaluated. The primary endpoint was a composite of all-cause mortality or nonfatal, centrally adjudicated, new Q-wave myocardial infarction.

**Results:** In the overall elderly (>75 years) population (n=2565), primary endpoint occurred in 7.2% of patients in the experimental group and in 9.4% of patients in the reference group (p=0.041) at 2 years (p int =0.23). Elderly patients in the experimental group had a lower rate of definite stent

thrombosis (ST) (0.2% vs. 0.9%, p=0.043, p int=0.03), definite or probable ST (0.4 vs. 1.3%, p=0.015, p int=0.01) and a numerically higher rates of BARC 3 or 5 type bleeding (5.0% vs. 3.9%, p=0.192, p int=0.06), when compared to the reference arm.

Among elderly patients presenting with ACS both treatment groups did not differ in the rates of primary endpoint (9.1% vs. 10.8%, p=0.367) and BARC 3 or 5 type bleeding (4.7% vs. 5.7%, p=0.458), whereas among elderly patients with stable CAD the experimental strategy was associated with numerically lower rates of the primary endpoint (5.7% vs. 8.4%, p=0.046) (p int =0.42) and a higher rate of BARC 3 or 5 type bleedings (5.3% vs. 2.6%, p=0.012) (p int =0.02) at 2 years.

Exploratory analyses among very elderly (≥80 years) patients (n=1169) indicated no significant differences between treatment groups in the rates of the primary endpoint (10.2% vs. 11.7% p=0.411, p int=0.940) and BARC 3 or 5 type bleeding (6.0% vs. 5.3%, p=0.630, p int=0.514) at 2 years.

**Conclusions:** The efficacy and safety of the experimental treatment strategy of 23-month ticagrelor monotherapy after 1-month DAPT following PCI was not identified as age-dependent. Among elderly patients the anti-ischemic benefit was derived at the expense of increased rate of BARC 3 or 5 type bleeding in stable CAD subgroup, but not in ACS subgroup.
